# Supplementary material
Source: publisher figshare collection journal article supplement (https://acs.figshare.com/ndownloader/files/4426159)
Supplement: Supplementary file 1 [file 4426159]

## Supplementary Information

### Electrowetting properties of micro/nanostructured black silicon

M. Barberoglou<sup>1,2</sup>, V. Zorba<sup>3</sup>, A. Pagkozidis<sup>1,4</sup>, C. Fotakis<sup>1,2</sup> and E. Stratakis<sup>1,4\*</sup>

<sup>1</sup>Institute of Electronic Structure and Laser, Foundation for Research & Technology—Hellas, (IESL-FORTH), P.O. Box 1527, Heraklion 711 10, Greece.

<sup>2</sup>Physics Department, University of Crete, Heraklion 714 09, Greece.

<sup>3</sup>Lawrence Berkeley National Laboratory, Berkeley, California 94720, USA

<sup>4</sup>Materials Science and Technology Department, University of Crete, Heraklion 710 03, Greece.

**Video 1S:** EWOD on a superhydrophobic black Si surface.

**Video 2S:** Impact of a 10µl water droplet on a superhydrophobic black Si surface. The impact speed is 3.10 m/s and the droplet bounces off the surface numerous times.

**Video 3S:** Impact of a 10µl water droplet on a hydrophobic black Si surface. The impact speed is 3.10 m/s and droplet remains stuck on the surface.

---

\* Author to whom correspondence should be addressed; e-mail: stratak@iesl.forth.gr
